# Supplementary material
Source: PubMed Central journal article supplement (PMC9067009)

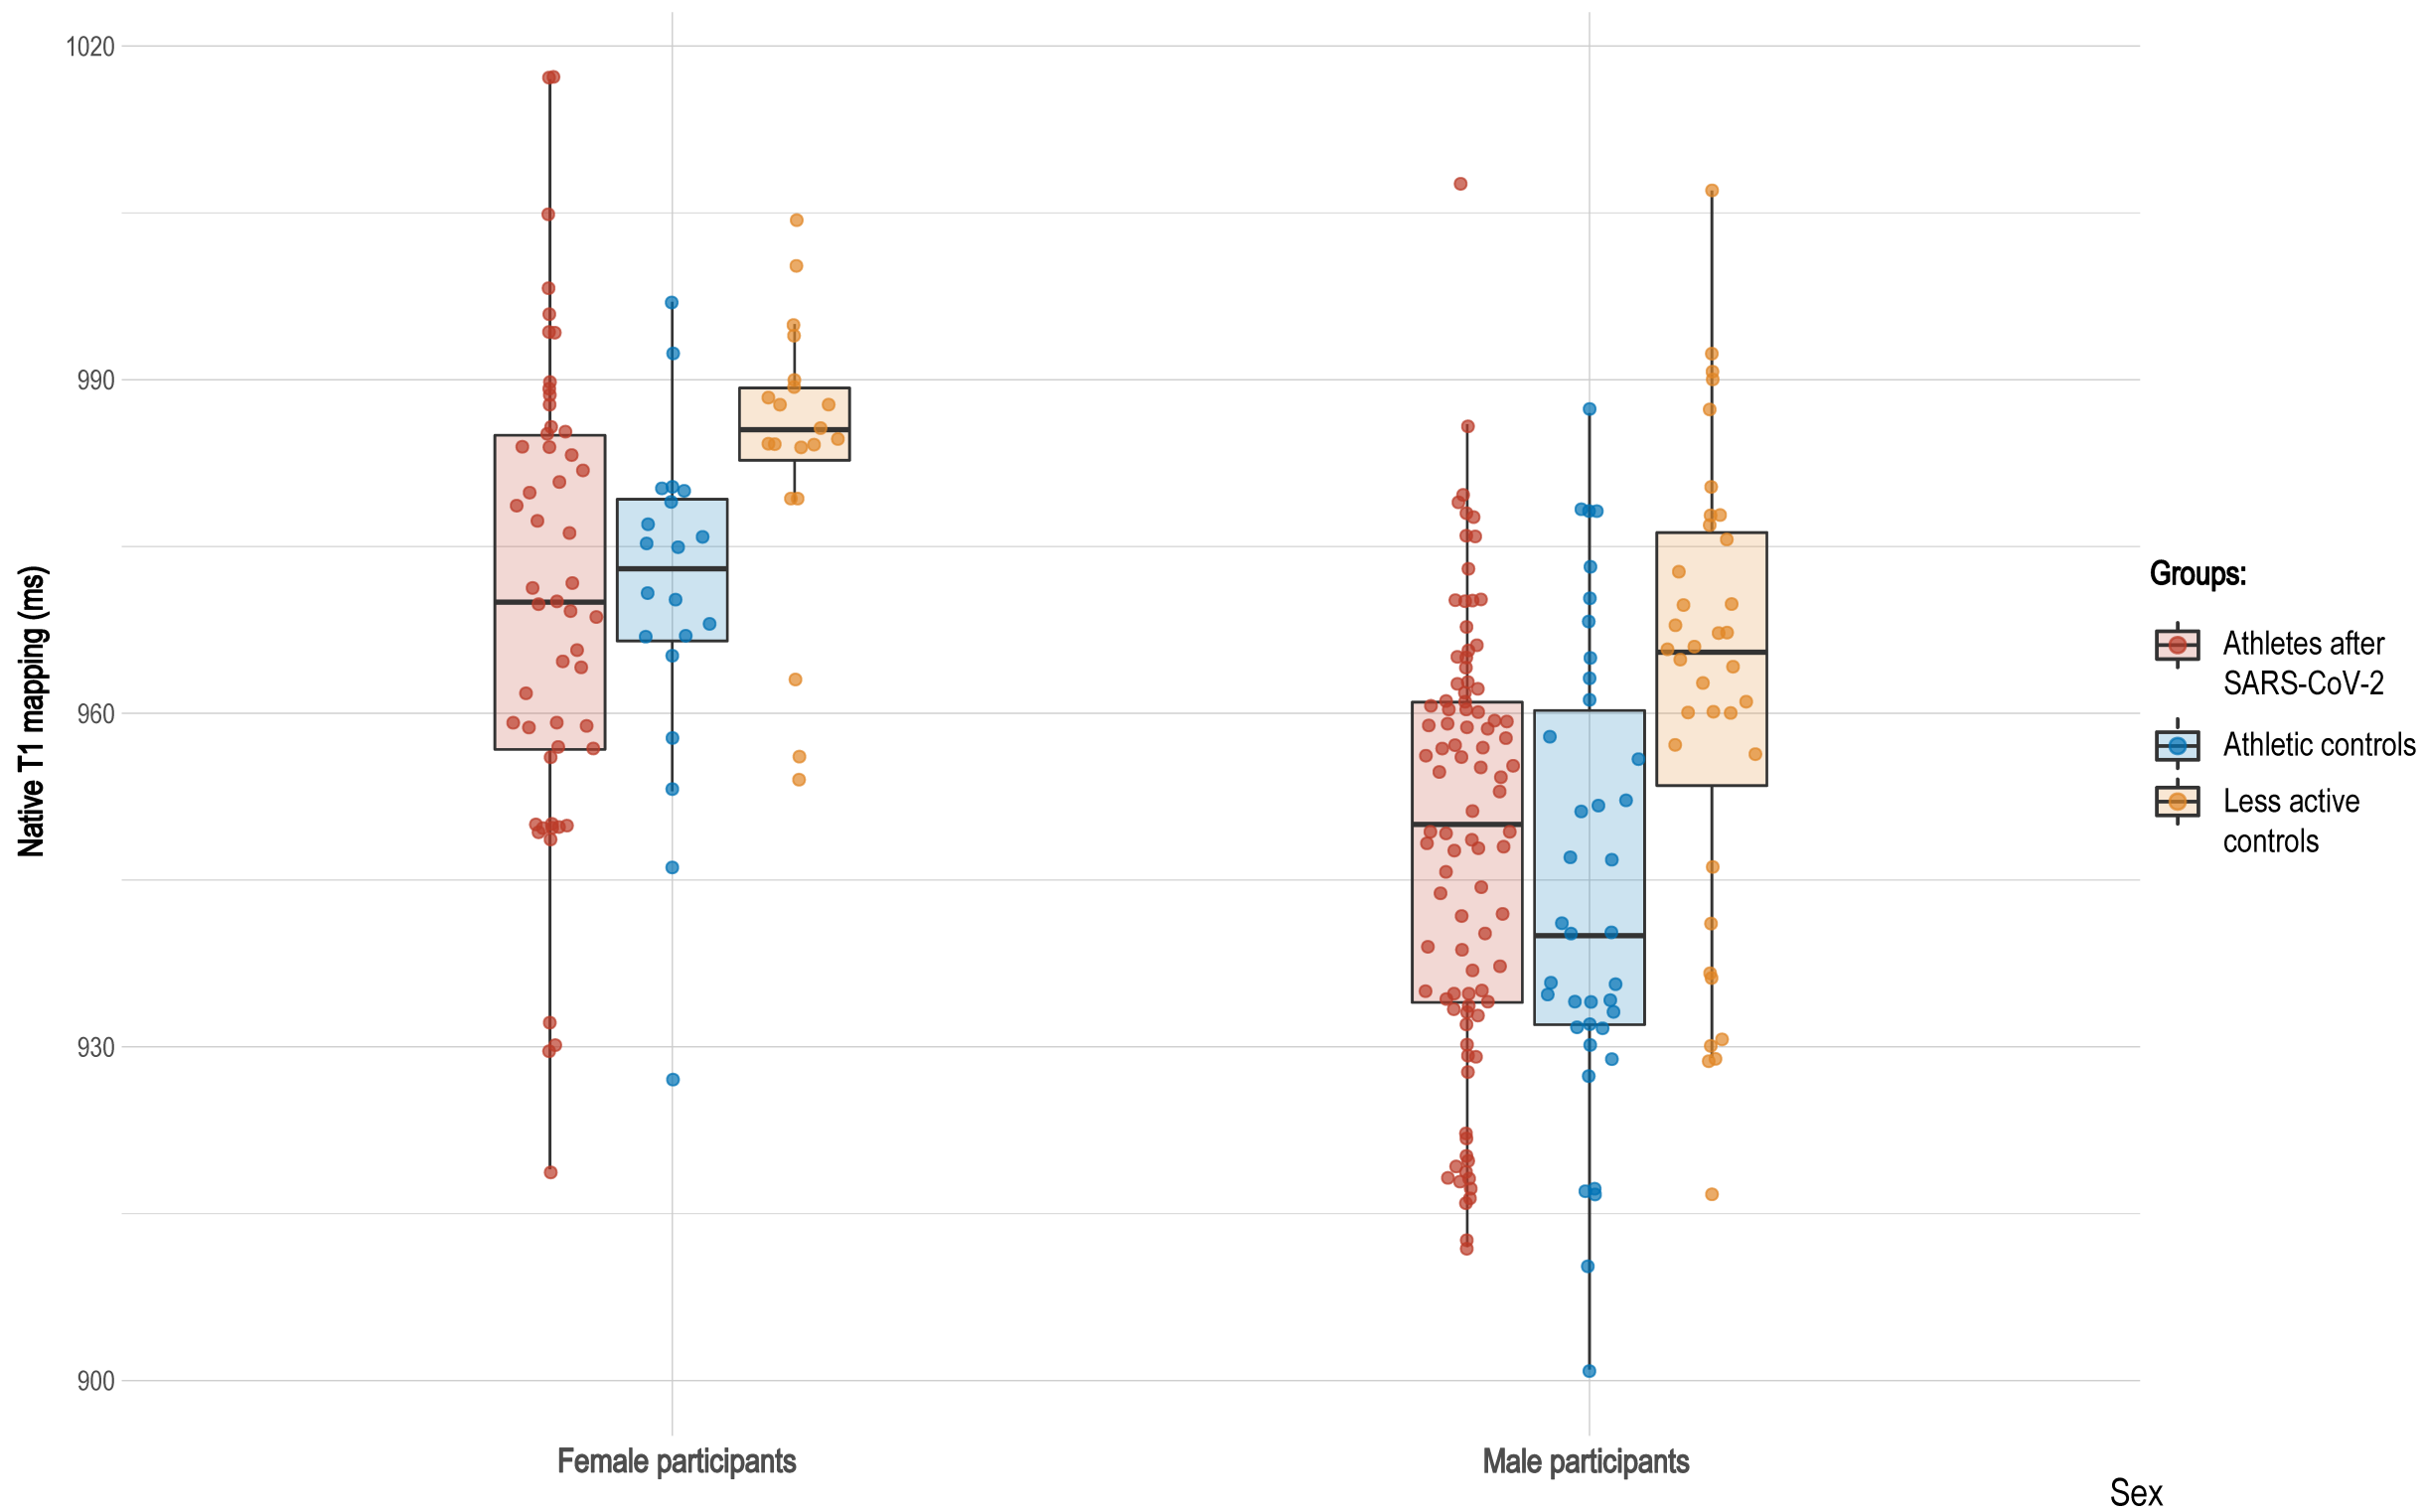

Supplement: bjsports-2021-104576supp001.pdf [file bjsports-2021-104576supp001.pdf]
