# Supplementary material
Source: PubMed Central journal article supplement (PMC9067009)
Supplement: bjsports-2021-104576supp002.pdf [file bjsports-2021-104576supp002.pdf]

## Supplement 2: Acute and follow-up CMR of post-COVID-19 athletes showing alterations on CMR scan

| Athlete No. | Sex    | Symptoms                                                                                                                                                                          | CMR findings                                                                                                                                                       | CMR images                                                                                                                       | Time to follow-up CMR from COVID-19 (days) | Follow-up CMR findings                                                                                                                                             | Follow-up CMR images                                                                                                              |
|-------------|--------|-----------------------------------------------------------------------------------------------------------------------------------------------------------------------------------|--------------------------------------------------------------------------------------------------------------------------------------------------------------------|----------------------------------------------------------------------------------------------------------------------------------|--------------------------------------------|--------------------------------------------------------------------------------------------------------------------------------------------------------------------|-----------------------------------------------------------------------------------------------------------------------------------|
| 1.          | Male   | Moderate <ul style="list-style-type: none"> <li>headache</li> <li>fever</li> <li>chest pain</li> <li>joint pain</li> <li>diarrhea</li> <li>smell and taste disturbance</li> </ul> | LVEF: 52 %<br>GLS: -18 %<br>Septal native T1: normal<br>Septal native T2: normal<br>Pathological LGE / pattern: Yes - Lateral subepicardial LGE (SSD method): 9.3% | 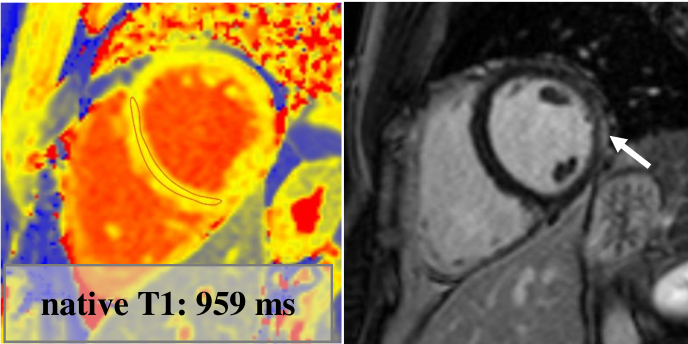<br>native T1: 959 ms                          | 299                                        | LVEF: 58 %<br>GLS: -20 %<br>Septal native T1: normal<br>Septal native T2: normal<br>Pathological LGE / pattern: Yes - Lateral subepicardial LGE (SSD method): 5.4% | <br>native T1: 911 ms                          |
| 4.          | Female | Long- COVID <ul style="list-style-type: none"> <li>palpitation</li> <li>long lasting fatigue</li> </ul>                                                                           | LVEF: 67 %<br>GLS: -27 %<br>Septal native T1: gray zone normal/elevated<br>Septal native T2: elevated<br>Pathological LGE / pattern: No                            | <br>native T2: 51 ms      native T1: 1005 ms   | 129                                        | LVEF: 62 %<br>GLS: -27 %<br>Septal native T1: normal<br>Septal native T2: normal<br>Pathological LGE / pattern: No                                                 | <br>native T2: 44 ms      native T1: 979 ms    |
| 5.          | Female | Moderate <ul style="list-style-type: none"> <li>chest pain</li> <li>back pain</li> <li>smell and taste disturbance</li> </ul>                                                     | LVEF: 60 %<br>GLS: -22 %<br>Septal native T1: elevated<br>Septal native T2: elevated<br>Pathological LGE / pattern: No                                             | <br>native T2: 50 ms      native T1: 1017 ms | 105                                        | LVEF: 62 %<br>GLS: -25 %<br>Septal native T1: normal<br>Septal native T2: normal<br>Pathological LGE / pattern: No                                                 | <br>native T2: 47 ms      native T1: 928 ms  |
| 6.          | Female | Mild <ul style="list-style-type: none"> <li>fever</li> <li>fatigue</li> <li>palpitation</li> <li>smell and taste disturbance</li> </ul>                                           | LVEF: 55 %<br>GLS: -18 %<br>Septal native T1: elevated<br>Septal native T2: normal<br>Pathological LGE / pattern: No                                               | <br>native T2: 46 ms      native T1: 1017 ms | 81                                         | LVEF: 57 %<br>GLS: -21 %<br>Septal native T1: gray zone normal/elevated<br>Septal native T2: normal                                                                | <br>native T2: 44 ms      native T1: 1010 ms |
